# Supplementary material for: Hallmarks of tumor-experienced T cells are absent in multiple myeloma patients from diagnosis through maintenance therapy
Source: PubMed Central journal article supplement — bioRxiv. 2024 Jun 4:2024.06.03.597178. Preprint. [Version 1] doi: 10.1101/2024.06.03.597178 (PMC11185627; doi:10.1101/2024.06.03.597178), 2024-06-04
Supplement: media-1.pdf [file media-1.pdf]

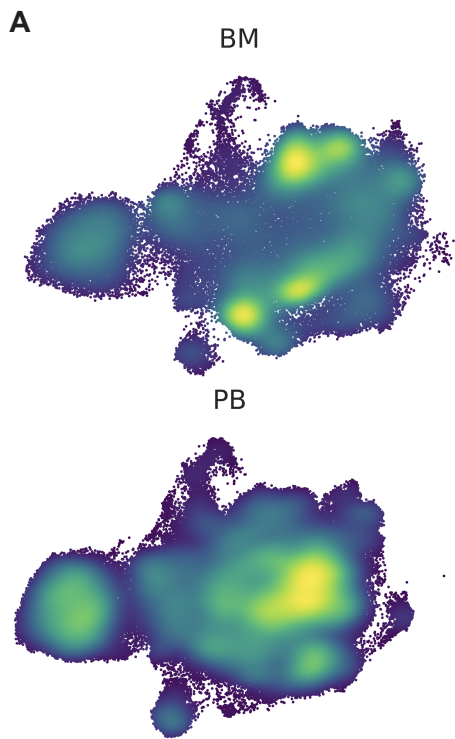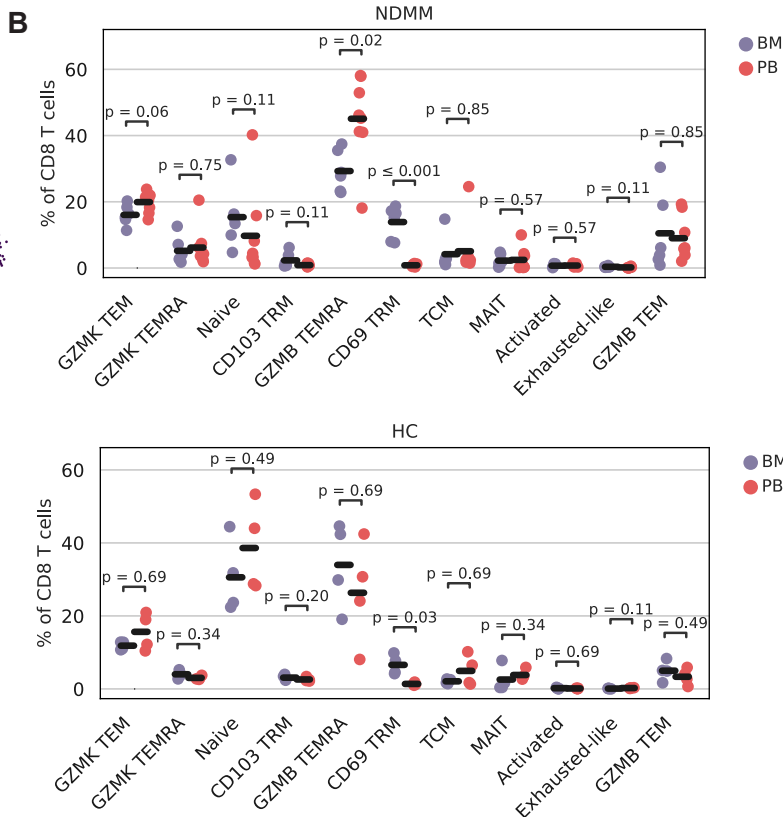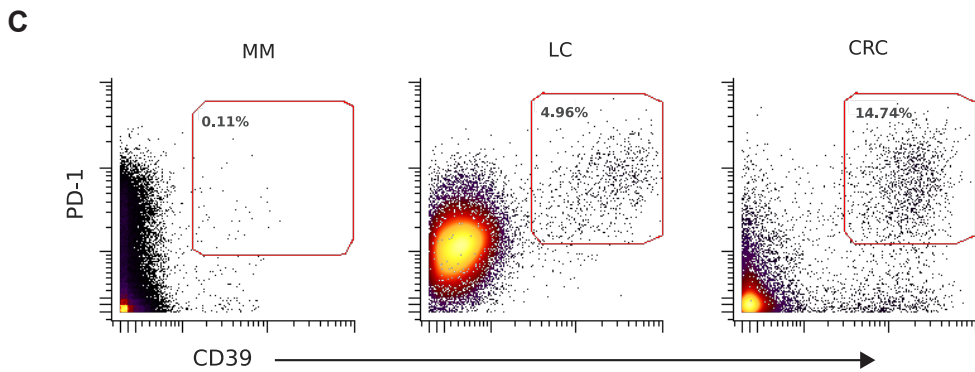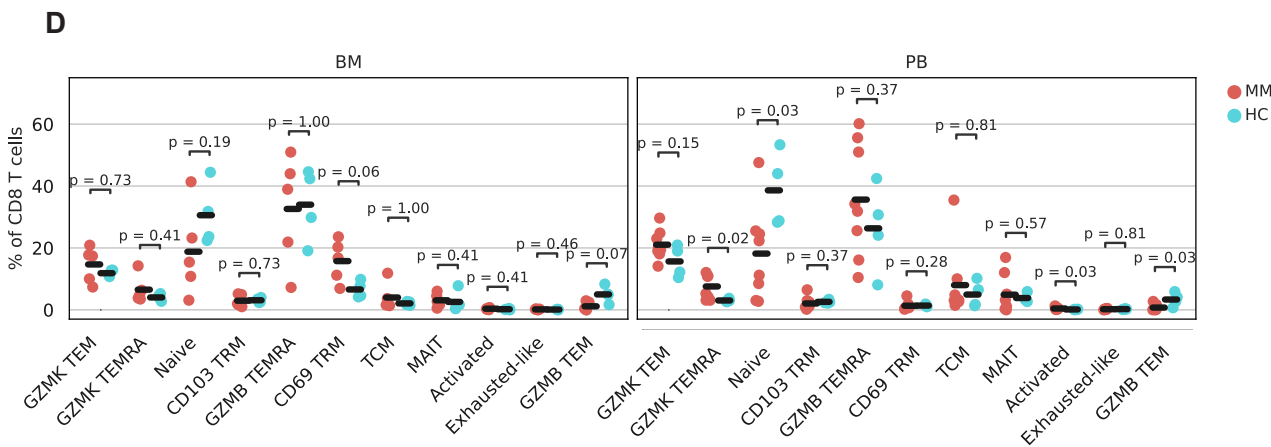

**Figure S1: Cell population and antigen-specificity quantification**

S1A: TotalVI-UMAP separated by tissue and colored by density

S1B: Frequency of cell populations by tissue, separated into newly-diagnosed multiple myeloma (NDMM) patients (top) and HCs (bottom); p calculated by Wilcoxon rank sum test.

S1C: Representative gating of PD-1<sup>++</sup>CD39<sup>+</sup> CD8<sup>+</sup> T cells from NDMM, lung cancer (LC), and colorectal cancer (CRC) patients.

S1D: Frequency of cell populations by disease status (MM or HC), separated by tissue; p calculated by Wilcoxon rank sum test.

BM % antigen-specific

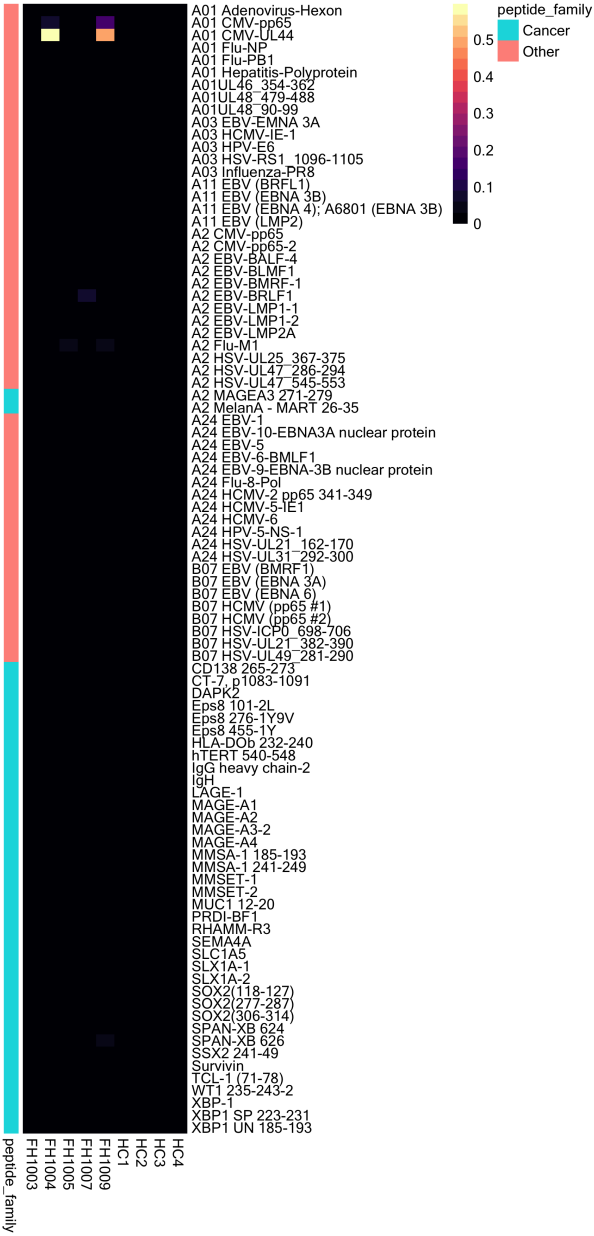

PB % antigen-specific

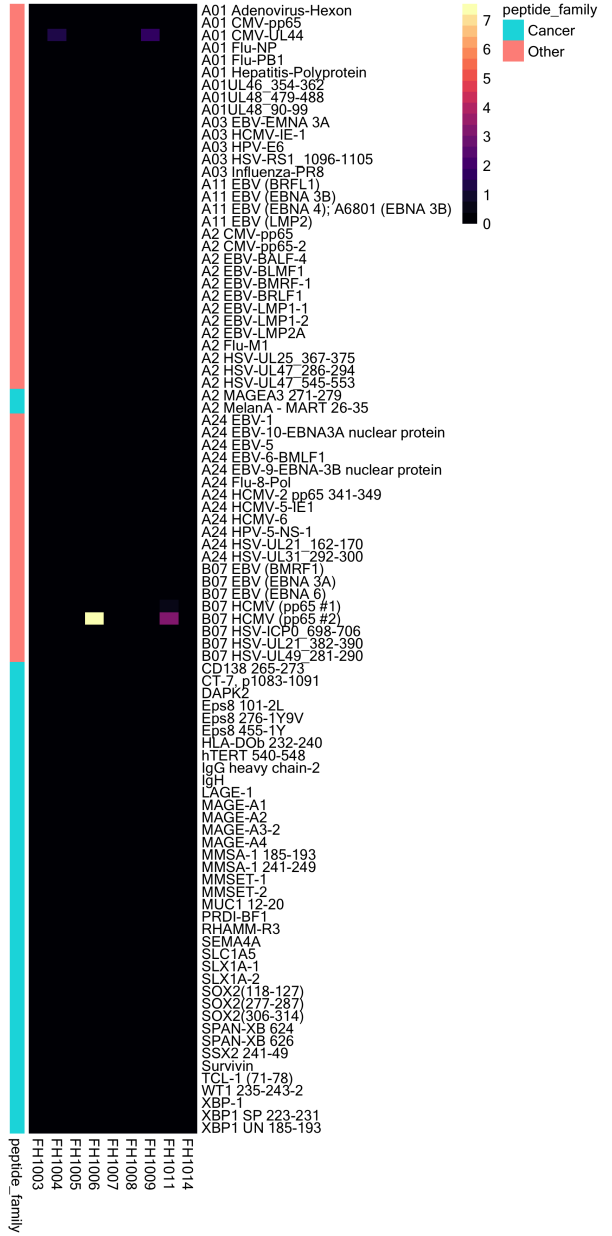

**Figure S2: PRETX Frequency of peptide-MHC tetramer<sup>+</sup>CD8<sup>+</sup> T cells by peptide, tissue, and individual.**

**A**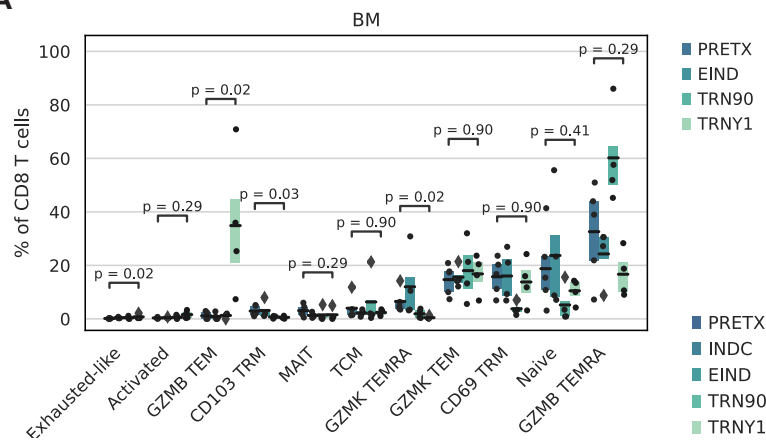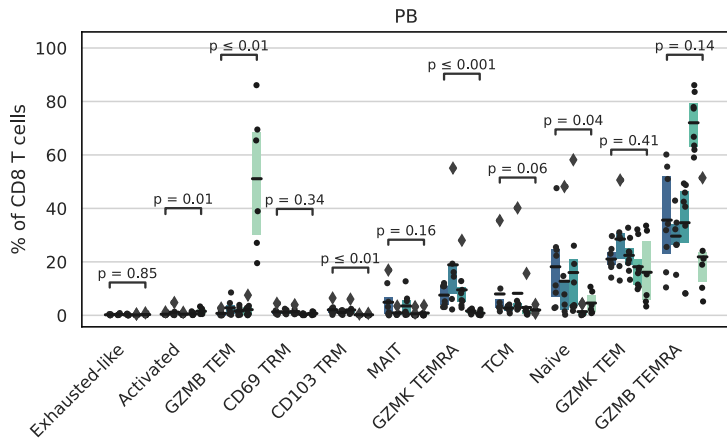**C**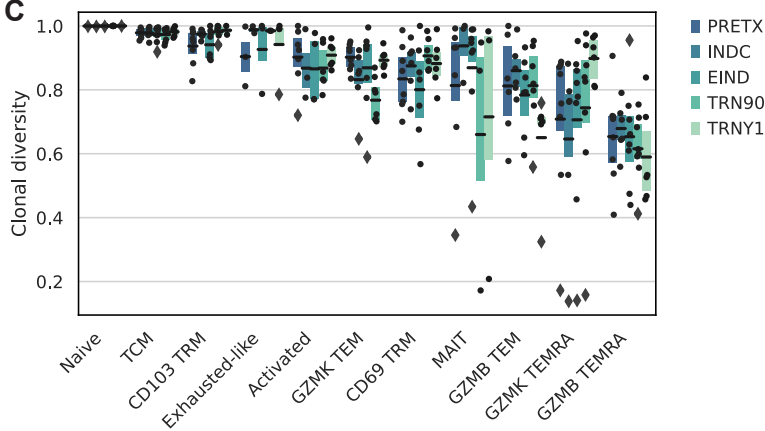**E**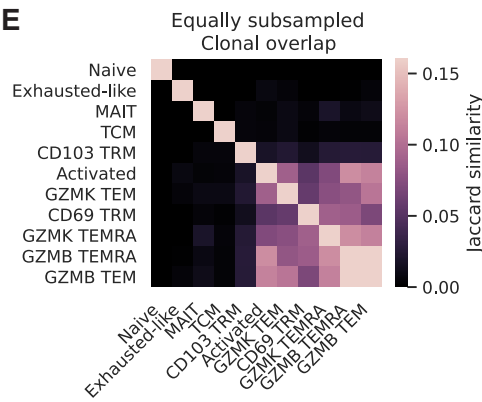**F**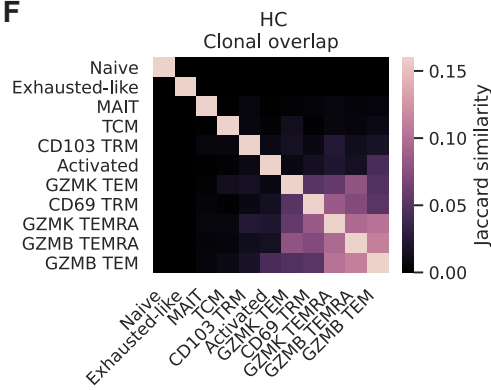**B**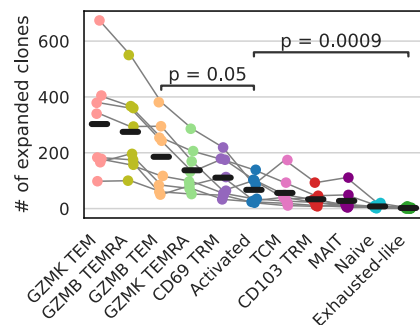**D**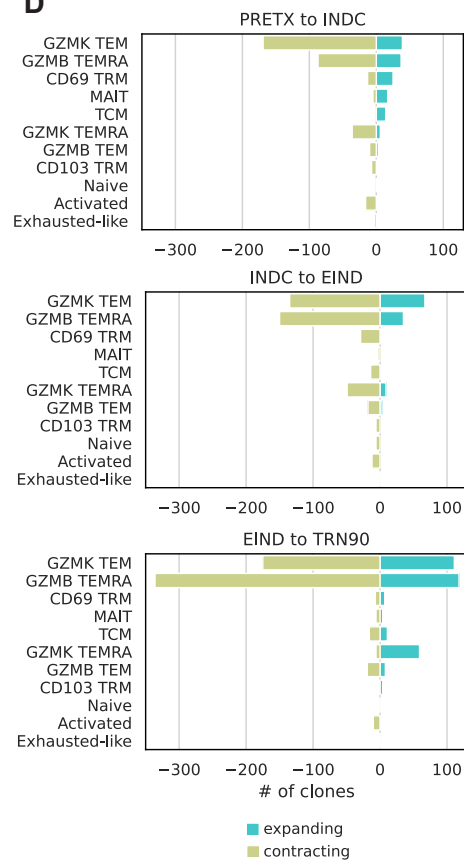

**Figure S3: Clonal and temporal dynamics**

S3A: Frequency of cell populations by time and tissue; p calculated by Wilcoxon rank sum test.

S3B: Number of expanded clones by population; p calculated by Wilcoxon rank sum test.

S3C: Alpha diversity (Shannon entropy) of clones by time and population.

S3D: Number of significantly ( $p < 0.05$ ) expanding and contracting clones by population and timepoint; p calculated by Fisher's exact test.

S3E: Jaccard similarity of clonal composition by population, equally sampled by population.

S3F: Jaccard similarity of clonal composition by population, for HCs only

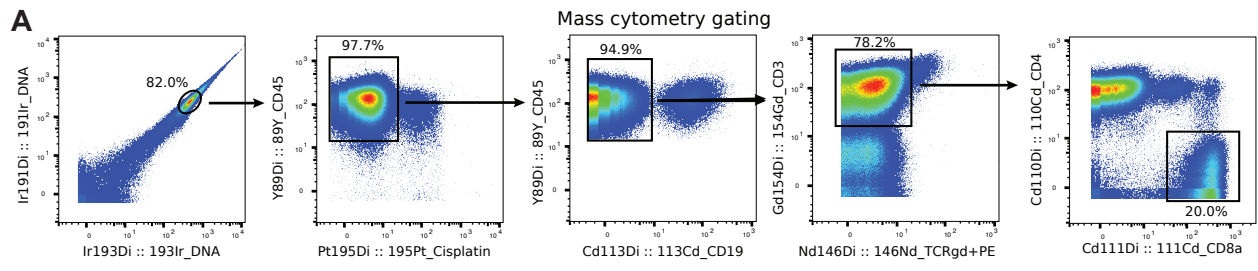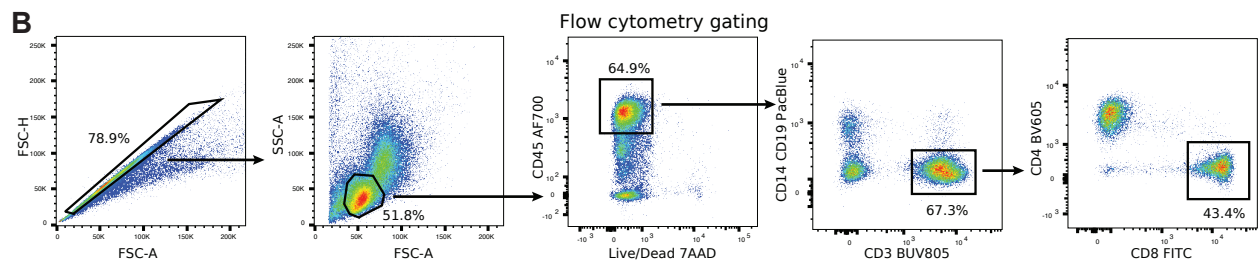

**Figure S4: Cytometry gating of CD8<sup>+</sup> T cells**

S4A: Representative gating of CD8<sup>+</sup> T cells in mass cytometry data

S4B: Representative gating of CD8<sup>+</sup> T cells in flow cytometry sorting data



**Table S1: Cohort demographics and clinical information**

**Table S2: Mass cytometry panel**

**Table S3: Mass cytometry peptide list**

**Table S4: Flow cytometry panel**

**Table S5: Antibody-derived tag (ADT) panel**
